# Supplementary material for: Noncovalent interactions in gold(iii) tetrakis(4-butoxyphenyl)porphyrinate structures
Source: Royal Society of Chemistry journal article supplement (doi:10.1039/d3ce00428g), 2023-01-01
Supplement: d3ce00428g6.pdf [file d3ce00428g6.pdf]

# Supporting Information for

## Non-covalent interactions in gold(III) tetrakis-(4-butoxyphenyl)-porphyrinate structures

Elena E. Bardina,<sup>a</sup> Eugeniya V. Makotchenko,<sup>a</sup> Kirill P. Birin,<sup>b</sup> Iraida A. Baidina,<sup>a</sup> Taisiya S. Sukhikh,<sup>a</sup> Alexander S. Novikov,<sup>c,d</sup> Yulia G. Gorbunova,<sup>b</sup> Aslan Yu. Tsivadze,<sup>b</sup> Artem L. Gushchin<sup>a\*</sup>

<sup>a</sup> *Nikolaev Institute of Inorganic Chemistry SB RAS, 630090, Acad. Lavrentiev Ave., 3, Novosibirsk, Russian Federation. E-mail: [gushchin@niic.nsc.ru](mailto:gushchin@niic.nsc.ru). ORCID: [0000-0003-3214-1433](https://orcid.org/0000-0003-3214-1433)*

<sup>b</sup> *Frumkin Institute of Physical Chemistry and Electrochemistry RAS, 119071, Leninsky prosp., 31, building 4, Moscow, Russian Federation. E-mail: [kirill.birin@gmail.com](mailto:kirill.birin@gmail.com). ORCID: [0000-0001-6951-2440](https://orcid.org/0000-0001-6951-2440)*

<sup>c</sup> *Institute of Chemistry, Saint Petersburg State University, 199034, Universitetskaya Nab., 7/9, Saint Petersburg, Russian Federation. E-mail: [a.s.novikov@spbu.ru](mailto:a.s.novikov@spbu.ru). ORCID: [0000-0001-9913-5324](https://orcid.org/0000-0001-9913-5324)*

<sup>d</sup> *Peoples' Friendship University of Russia (RUDN University), 117198, Miklukho-Maklaya St., 6, Moscow, Russian Federation*

### Table of contents

**Figure S1.** FT-IR spectrum of [Au(TBPP)][AuCl<sub>4</sub>] (**1**) in KBr.

**Figure S2.** <sup>1</sup>H NMR spectrum of [Au(TBPP)][AuCl<sub>4</sub>] (**1**) in C<sub>6</sub>D<sub>6</sub> (top) and numeration of protons in [Au(TBPP)]<sup>+</sup> (bottom).

**Figure S3.** CV of **1** in CH<sub>2</sub>Cl<sub>2</sub> in the range from -2.2 to 2.0 V at potential scan rate of 100 mV/s.

**Figure S4.** CV of TBPPH<sub>2</sub> in CH<sub>2</sub>Cl<sub>2</sub> in the range from -2.0 to 1.6 V at potential scan rate of 100 mV/s.

**Figure S5.** ESI-MS of [Au(TBPP)][AuCl<sub>4</sub>] (**1**) in CH<sub>3</sub>CN.

**Figure S6.** Model structure **1** (part a).

**Figure S7.** Model structure **1** (part b).

**Figure S8.** Model structure **1a** (part a).

**Figure S9.** Model structure **1a** (part b).

**Figure S10.** Model structure **1b**.

**Table S1.** Cartesian atomic coordinates for model structures.

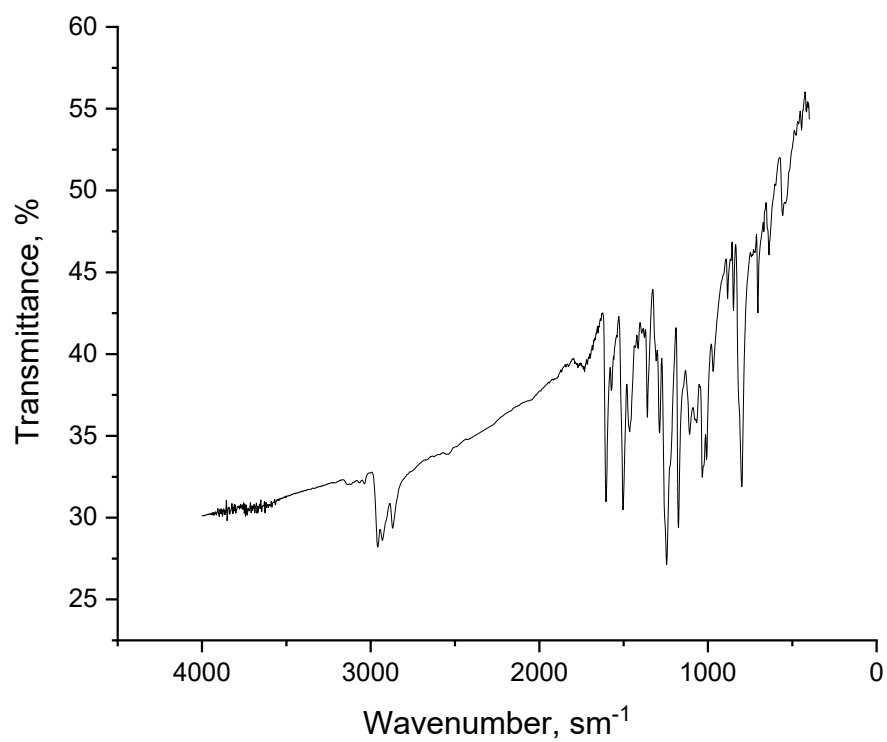

**Fig. S1.** FT-IR spectrum of [Au(TBPP)][AuCl<sub>4</sub>] (**1**) in KBr.

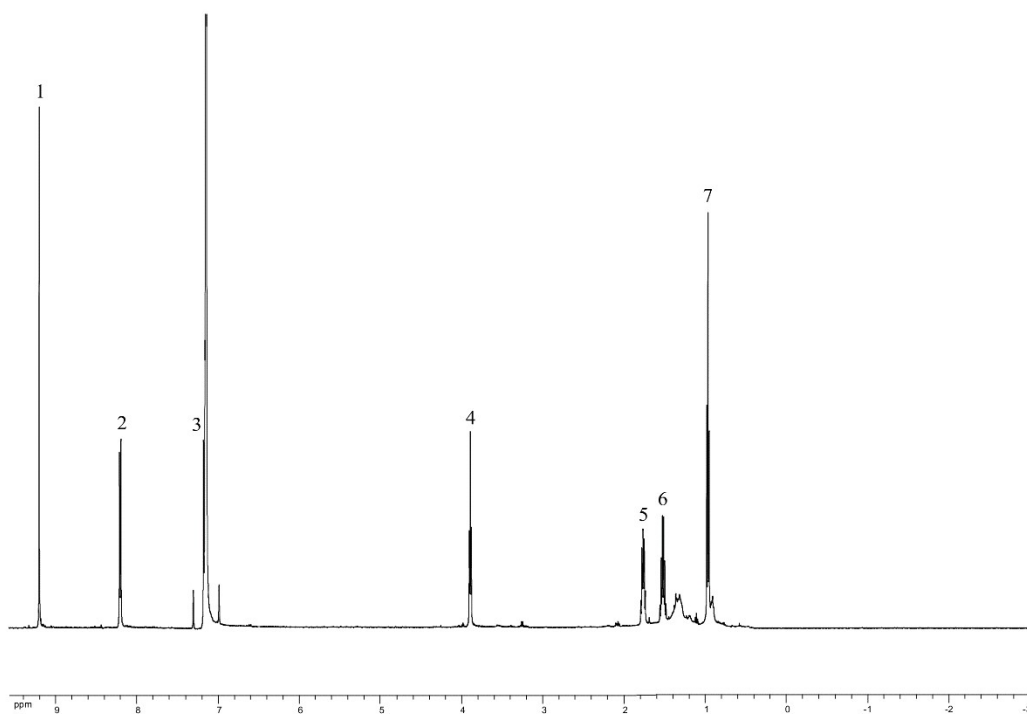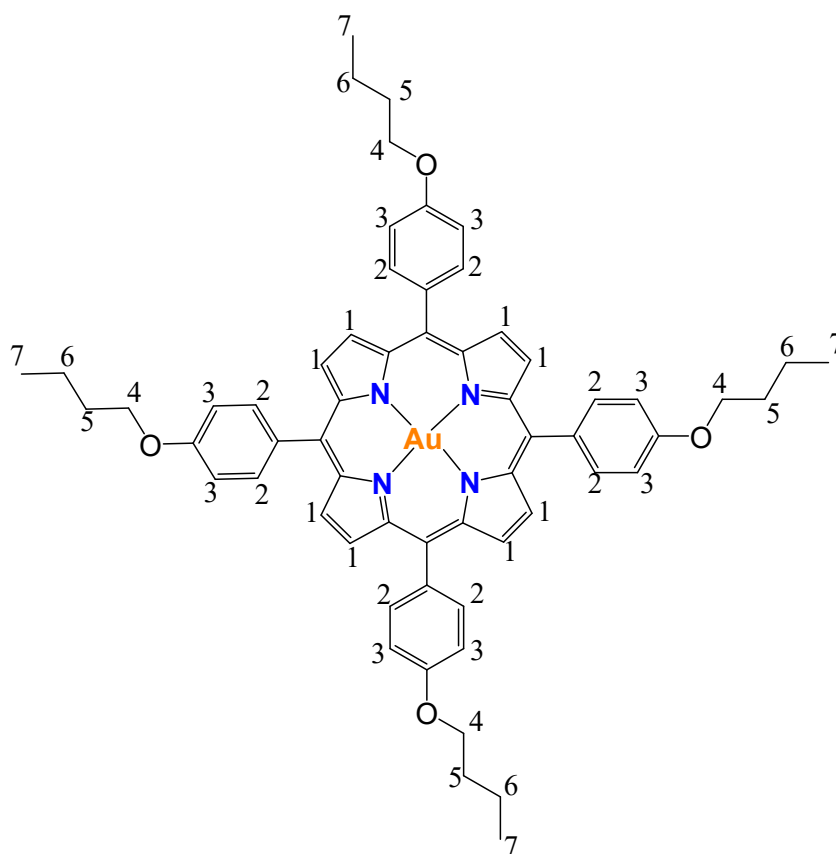

**Fig. S2.**  $^1\text{H}$  NMR spectrum of  $[\text{Au}(\text{TBPP})][\text{AuCl}_4]$  (**1**) in  $\text{C}_6\text{D}_6$  (top) and numeration of protons in  $[\text{Au}(\text{TBPP})]^+$  (bottom).

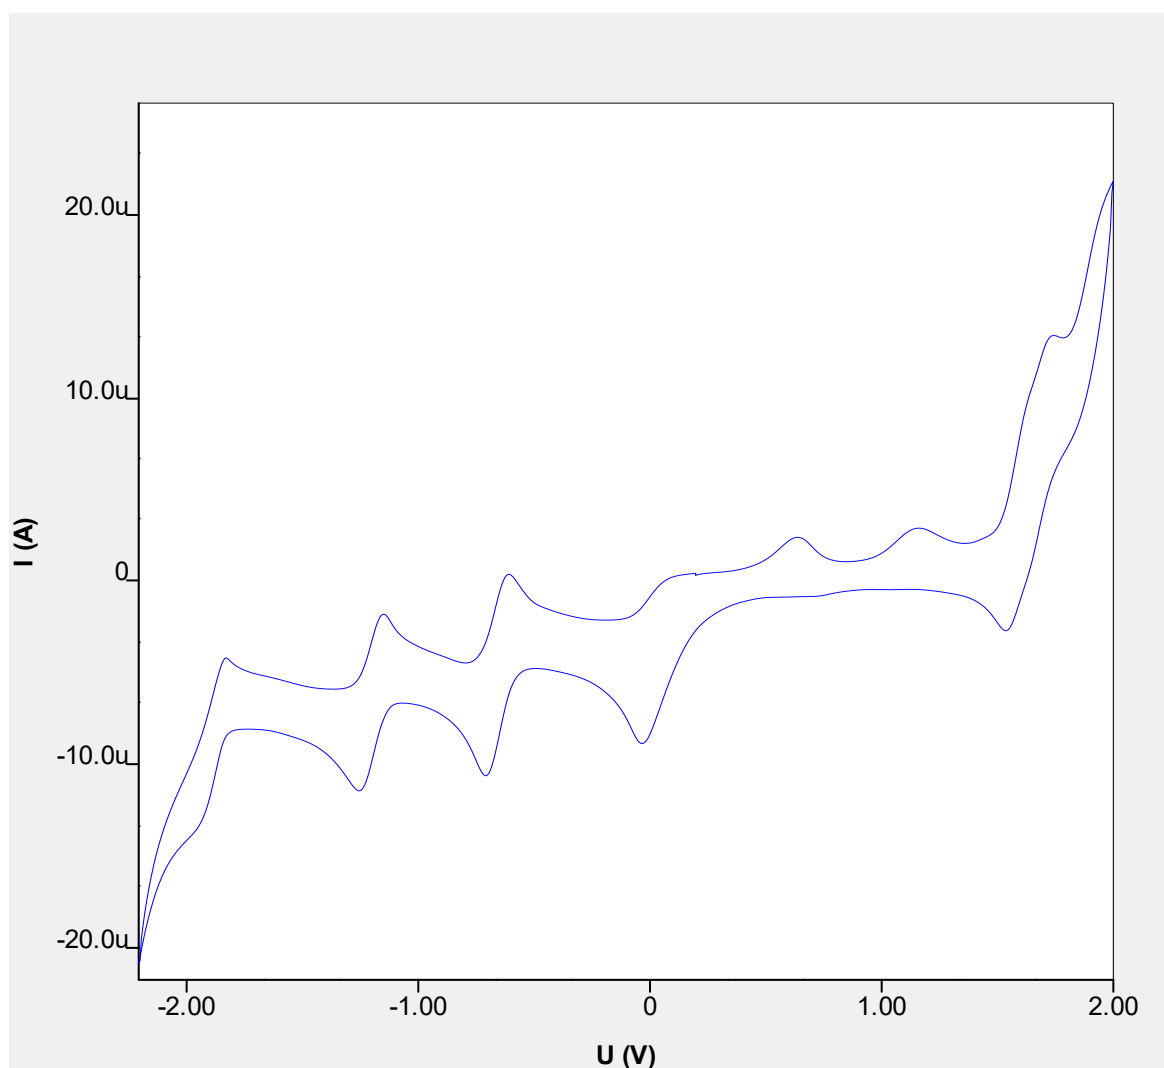

**Fig. S3.** CV of **1** in  $\text{CH}_2\text{Cl}_2$  in the range from -2.2 to 2.0 V at potential scan rate of 100 mV/s.

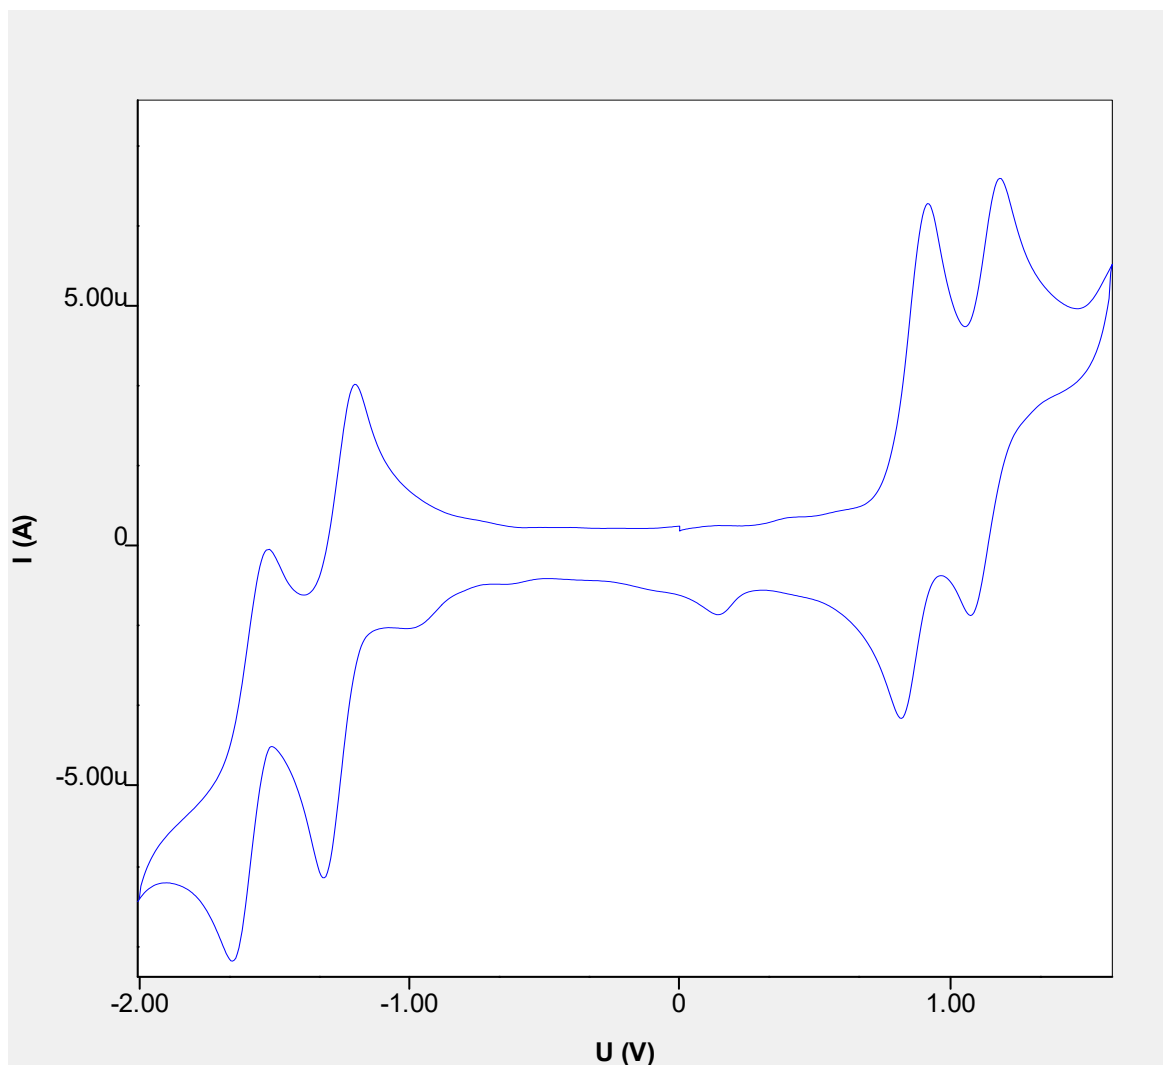

**Fig. S4.** CV of TBPPH<sub>2</sub> in CH<sub>2</sub>Cl<sub>2</sub> in the range from -2.0 to 1.6 V at potential scan rate of 100 mV/s.

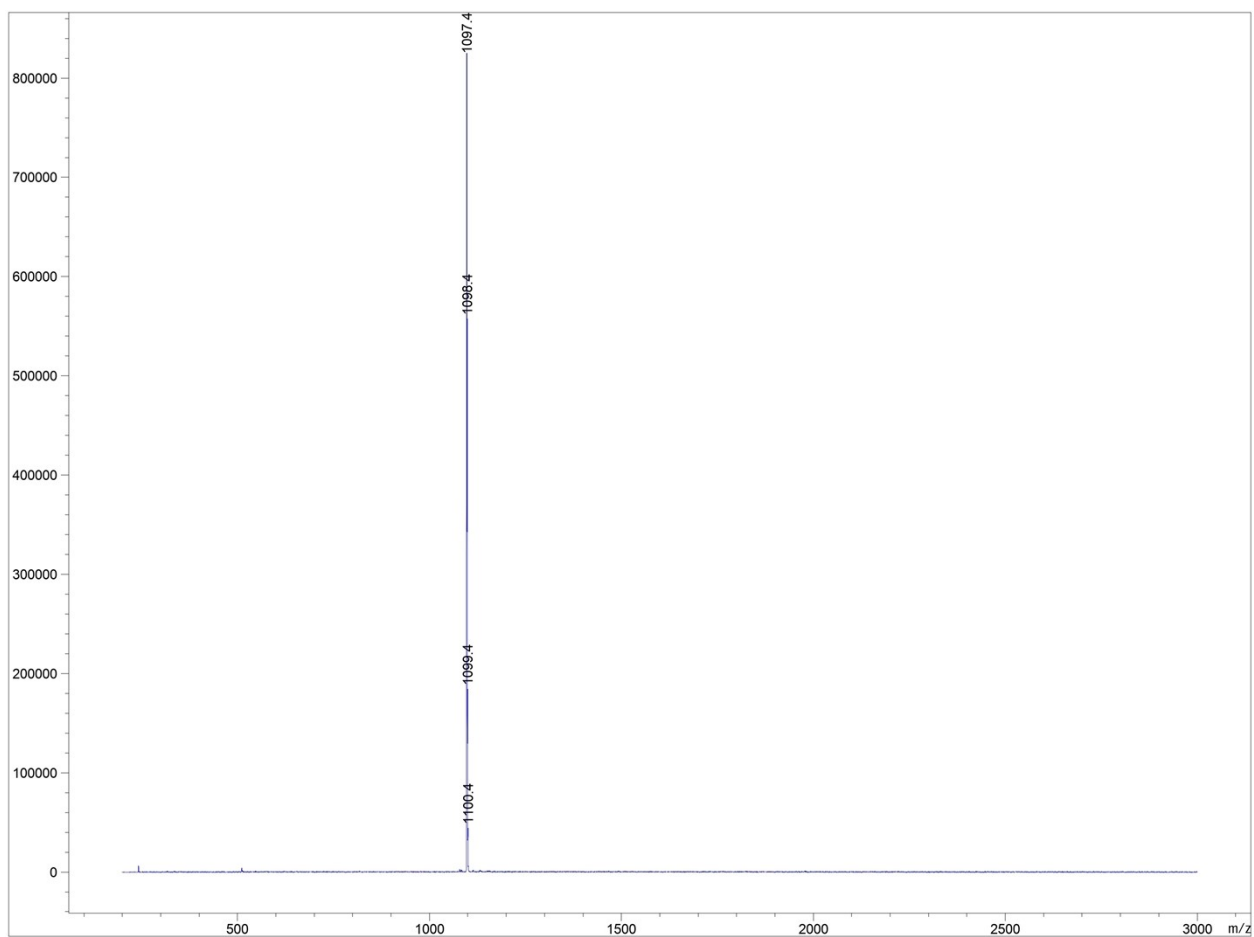

**Fig. S5.** ESI-MS of  $[\text{Au}(\text{TBPP})][\text{AuCl}_4]$  (**1**) in  $\text{CH}_3\text{CN}$ .

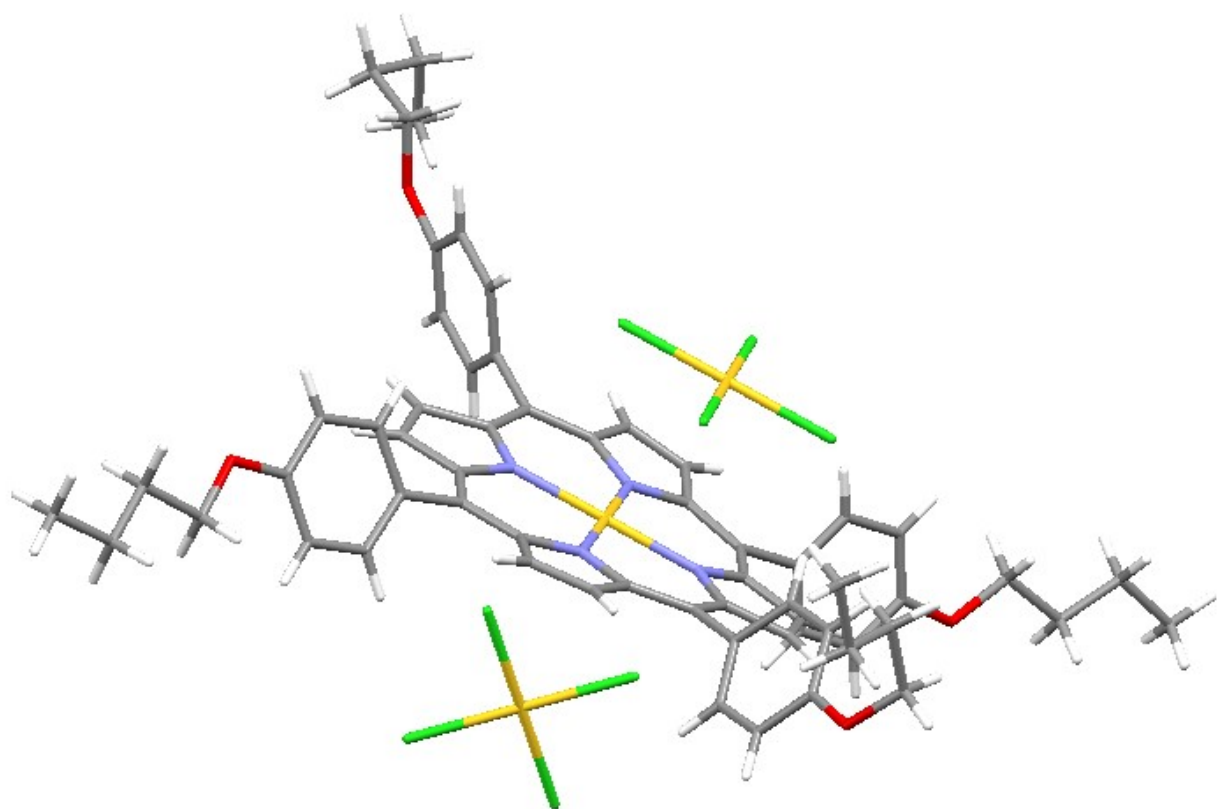

**Fig. S6. Model structure 1 (part a).**

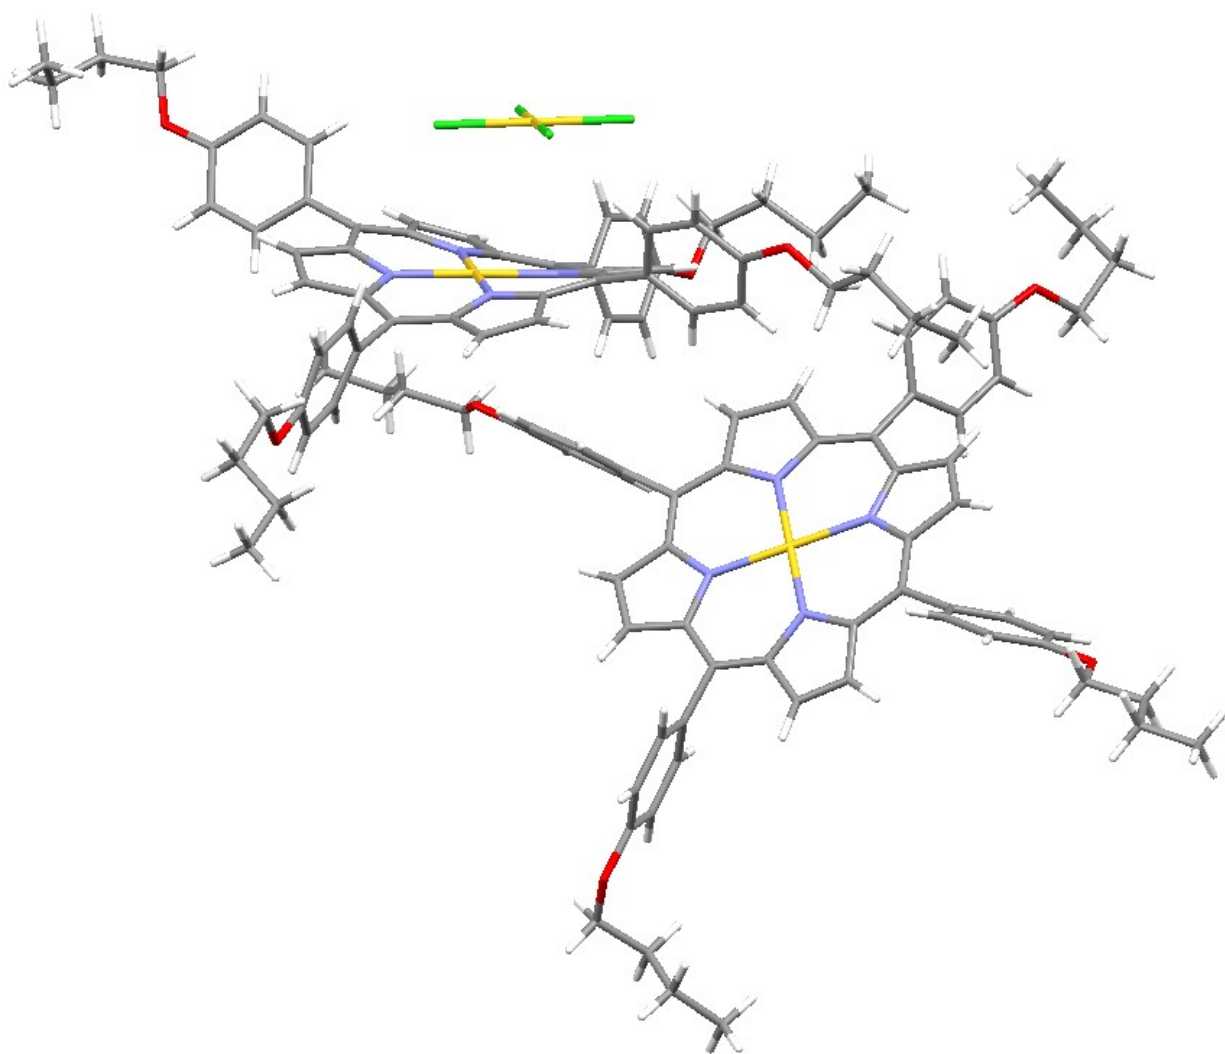

**Fig. S7. Model structure 1 (part b).**



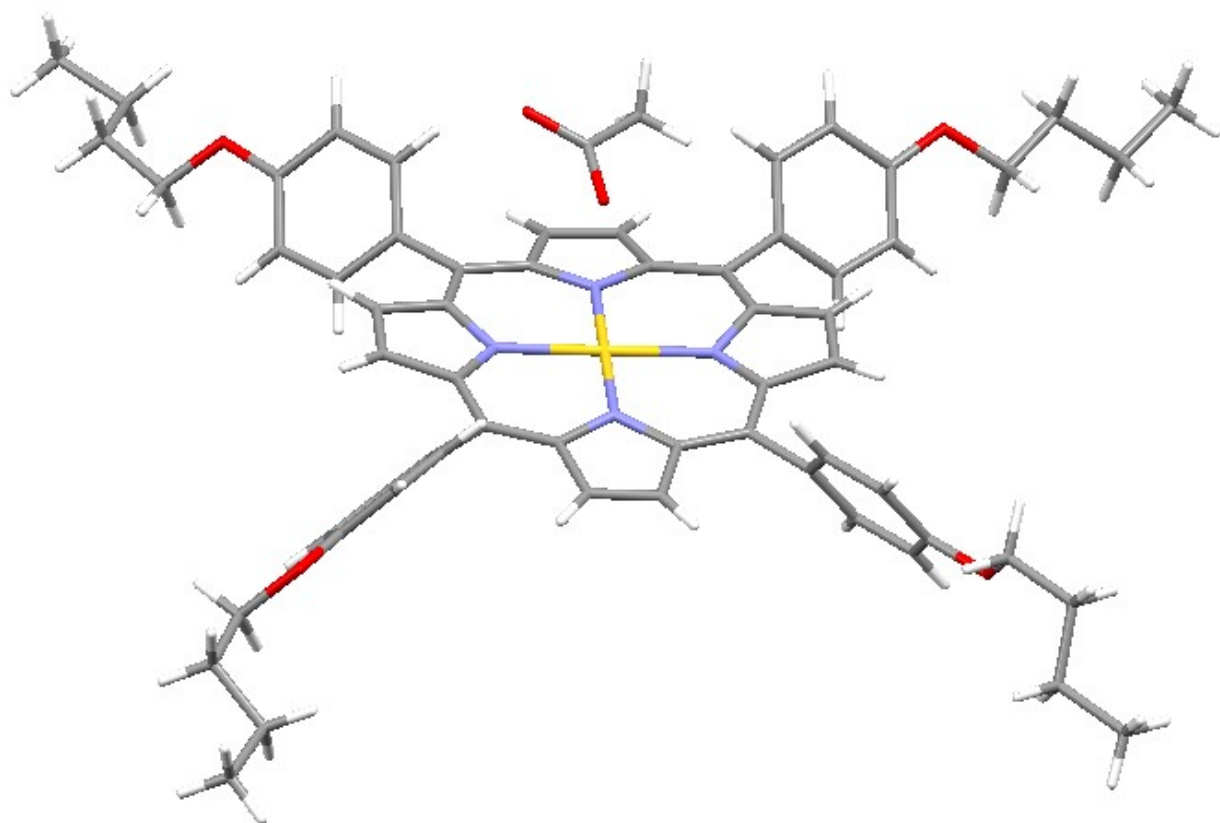

**Fig. S8.** Model structure **1a** (part a).

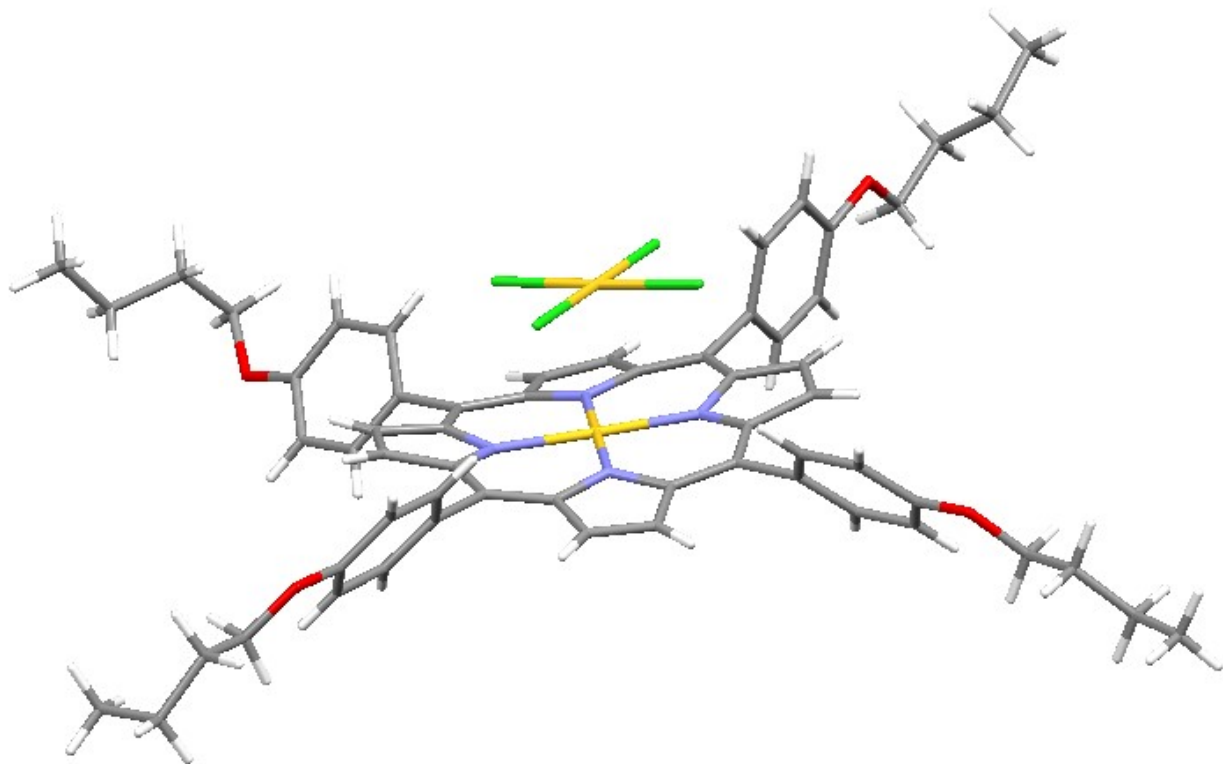

**Fig. S9.** Model structure **1a** (part b).

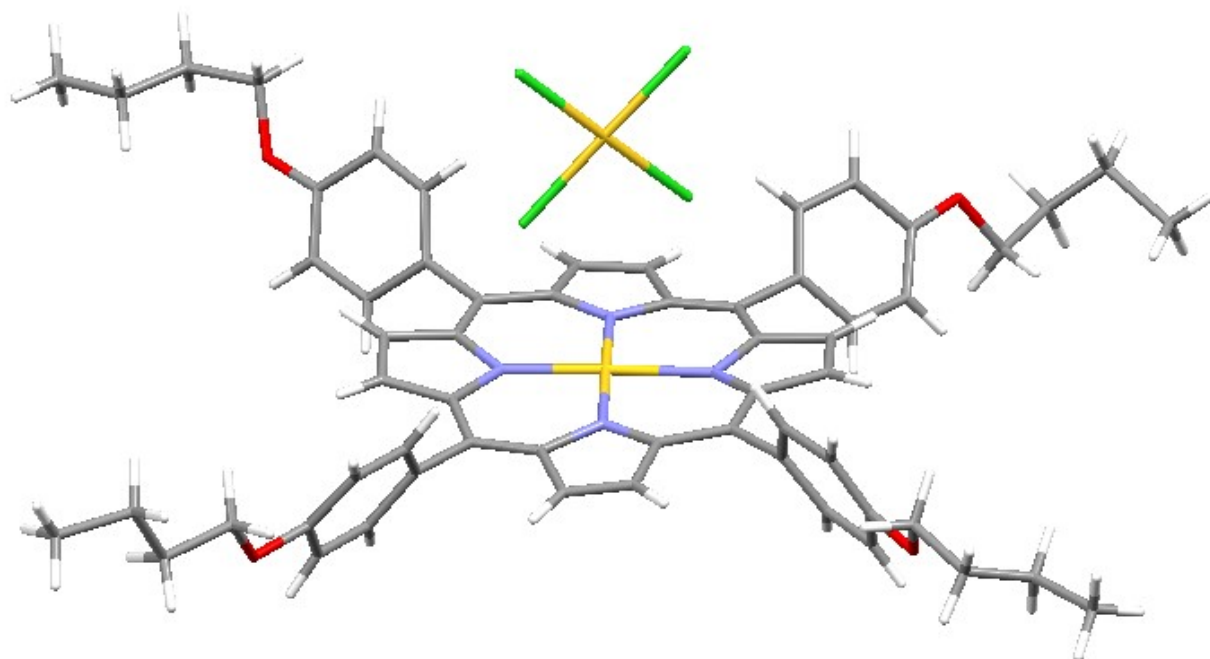

**Fig. S10.** Model structure **1b**.

**Table S1.** Cartesian atomic coordinates for model structures.

| Atom              | X         | Y         | Z         |
|-------------------|-----------|-----------|-----------|
| <b>1 (part a)</b> |           |           |           |
| Au                | 6.177394  | 9.212468  | 1.131917  |
| Cl                | 6.571315  | 8.948653  | -1.092832 |
| Cl                | 3.956893  | 8.812639  | 0.771445  |
| Cl                | 5.813553  | 9.464046  | 3.355118  |
| Cl                | 8.393470  | 9.630194  | 1.502257  |
| Au                | 5.075128  | 12.261851 | -0.351958 |
| O                 | 10.404439 | 15.121007 | 6.450959  |
| O                 | -0.476323 | 10.446798 | -7.356686 |
| O                 | 12.309407 | 11.055907 | -5.704087 |
| O                 | -2.062256 | 10.561412 | 5.009458  |
| N                 | 7.054233  | 12.587376 | -0.104485 |
| N                 | 4.790884  | 12.523320 | 1.634991  |
| N                 | 3.096069  | 11.946129 | -0.601754 |
| N                 | 5.359270  | 11.991049 | -2.343165 |
| C                 | 7.089492  | 13.151817 | 2.300597  |
| C                 | 7.683703  | 12.991850 | 1.058391  |
| C                 | 8.030266  | 12.468784 | -1.071935 |
| C                 | 10.950893 | 14.288349 | 7.451302  |
| H                 | 10.235944 | 13.976007 | 8.061860  |
| H                 | 11.380386 | 13.497460 | 7.041142  |
| C                 | 11.980121 | 15.102746 | 8.225263  |
| H                 | 11.546628 | 15.926798 | 8.560484  |
| H                 | 12.701722 | 15.373531 | 7.604256  |
| C                 | 12.580550 | 14.381954 | 9.366854  |
| H                 | 11.864702 | 14.099403 | 9.990821  |
| H                 | 13.038354 | 13.567702 | 9.038463  |

|   |           |           |            |
|---|-----------|-----------|------------|
| C | 13.583787 | 15.266971 | 10.107921  |
| H | 14.263063 | 15.588587 | 9.479775   |
| H | 13.114660 | 16.033543 | 10.501654  |
| H | 14.014598 | 14.748920 | 10.819287  |
| C | 9.068149  | 13.144418 | 0.789439   |
| H | 9.727129  | 13.424695 | 1.414277   |
| C | 9.288850  | 12.825796 | -0.506944  |
| H | 10.126941 | 12.837931 | -0.954835  |
| C | 2.382411  | 12.019592 | 1.760760   |
| C | 5.765606  | 12.885883 | 2.565678   |
| C | 3.624891  | 12.319447 | 2.312206   |
| C | 5.148404  | 12.927190 | 3.848517   |
| H | 5.570627  | 13.166578 | 4.665607   |
| C | 3.862992  | 12.566770 | 3.701465   |
| H | 3.221410  | 12.491007 | 4.398532   |
| C | 3.005338  | 11.679688 | -3.064883  |
| C | 2.141136  | 11.918645 | 0.396655   |
| C | 2.423709  | 11.816709 | -1.799458  |
| C | -0.368288 | 11.137284 | -8.614178  |
| H | -0.564016 | 12.101103 | -8.496671  |
| H | 0.544460  | 11.042570 | -8.983821  |
| C | -1.390814 | 10.497881 | -9.546800  |
| H | -2.302422 | 10.636653 | -9.188553  |
| H | -1.225615 | 9.523053  | -9.603260  |
| C | -1.285259 | 11.113868 | -10.928319 |
| H | -1.436937 | 12.089840 | -10.862861 |
| H | -0.370829 | 10.971102 | -11.280664 |
| C | -2.297751 | 10.512548 | -11.903509 |
| H | -2.140349 | 9.548642  | -11.985046 |
| H | -3.205800 | 10.667569 | -11.568055 |
| H | -2.197548 | 10.935466 | -12.781606 |
| C | 0.857571  | 11.828154 | -0.203165  |
| H | 0.024791  | 11.805276 | 0.254672   |
| C | 1.033060  | 11.785061 | -1.522767  |
| H | 0.341592  | 11.738147 | -2.172700  |
| C | 7.829813  | 12.076808 | -2.395407  |
| C | 4.372257  | 11.706517 | -3.285461  |
| C | 6.582350  | 11.872303 | -2.966203  |
| C | 13.150748 | 9.920183  | -5.535751  |
| H | 13.960654 | 10.066459 | -6.087217  |
| H | 13.443826 | 9.903606  | -4.590939  |
| C | 5.019672  | 11.398294 | -4.508319  |
| H | 4.588261  | 11.168167 | -5.321809  |
| C | 6.342448  | 11.486458 | -4.320633  |
| H | 7.008687  | 11.320114 | -4.977280  |
| C | 7.959062  | 13.641291 | 3.434449   |
| C | 8.396590  | 14.942594 | 3.447993   |
| H | 8.131994  | 15.538923 | 2.758491   |
| C | 9.230599  | 15.391960 | 4.477360   |
| H | 9.544623  | 16.288734 | 4.466176   |
| C | 9.598925  | 14.559524 | 5.497053   |
| C | 9.154617  | 13.253939 | 5.497053   |

|   |           |           |           |
|---|-----------|-----------|-----------|
| H | 9.401509  | 12.665418 | 6.200776  |
| C | 8.331567  | 12.800937 | 4.448337  |
| H | 8.029371  | 11.900638 | 4.446382  |
| C | 1.223518  | 11.725743 | 2.658554  |
| C | 0.631237  | 12.693849 | 3.442188  |
| H | 0.959368  | 13.584527 | 3.436442  |
| C | -0.476535 | 12.338291 | 4.256781  |
| H | -0.878763 | 12.997182 | 4.809544  |
| C | -0.979392 | 11.046359 | 4.256781  |
| C | -0.372287 | 10.099208 | 3.484756  |
| H | -0.690653 | 9.204260  | 3.489303  |
| C | 0.703899  | 10.447907 | 2.697252  |
| H | 1.107439  | 9.778561  | 2.158150  |
| C | 2.102878  | 11.400020 | -4.208409 |
| C | 2.054624  | 12.219766 | -5.322912 |
| H | 2.608831  | 12.990454 | -5.352438 |
| C | 1.212985  | 11.947337 | -6.400651 |
| H | 1.202215  | 12.519440 | -7.159249 |
| C | 0.387114  | 10.824553 | -6.354214 |
| C | 0.409068  | 9.996527  | -5.247451 |
| H | -0.160407 | 9.236715  | -5.218446 |
| C | 1.250737  | 10.260928 | -4.185190 |
| H | 1.260320  | 9.680209  | -3.433578 |
| C | 9.033923  | 11.816660 | -3.235154 |
| C | 9.402290  | 12.660094 | -4.278065 |
| H | 8.895980  | 13.447135 | -4.441487 |
| C | 10.495535 | 12.376133 | -5.081049 |
| H | 10.725370 | 12.960232 | -5.794137 |
| C | 11.245263 | 11.250333 | -4.850796 |
| C | 10.905292 | 10.404576 | -3.802080 |
| H | 11.424205 | 9.627385  | -3.627745 |
| C | 9.809649  | 10.696233 | -3.012640 |
| H | 9.585536  | 10.112278 | -2.297965 |
| C | -2.485295 | 9.174825  | 5.059765  |
| H | -2.750578 | 8.859953  | 4.160191  |
| H | -1.749589 | 8.600806  | 5.392433  |
| C | -3.676205 | 9.124349  | 6.017541  |
| H | -4.143516 | 8.258090  | 5.918706  |
| H | -4.314852 | 9.845837  | 5.787346  |
| C | -3.231594 | 9.289611  | 7.424214  |
| H | -3.918586 | 8.913998  | 8.030476  |
| H | -2.391809 | 8.785595  | 7.563353  |
| C | -3.009405 | 10.729756 | 7.758952  |
| H | -2.717247 | 10.806051 | 8.690568  |
| H | -3.844328 | 11.226379 | 7.635060  |
| H | -2.318934 | 11.098087 | 7.168343  |
| C | 12.615991 | 8.543183  | -5.870489 |
| H | 13.271688 | 7.850360  | -5.603530 |
| H | 11.771488 | 8.378759  | -5.382197 |
| C | 12.370871 | 8.476779  | -7.377776 |
| H | 13.209200 | 8.680698  | -7.864230 |
| H | 11.690753 | 9.147842  | -7.637285 |

|                   |           |           |           |
|-------------------|-----------|-----------|-----------|
| C                 | 11.886441 | 7.076897  | -7.743472 |
| H                 | 11.726766 | 7.028903  | -8.708678 |
| H                 | 11.052873 | 6.885565  | -7.264236 |
| H                 | 12.567073 | 6.419715  | -7.490562 |
| Au                | 4.490680  | 17.066474 | 0.000000  |
| Cl                | 6.230162  | 15.877043 | 0.840908  |
| Cl                | 3.428411  | 15.119461 | -0.530937 |
| Cl                | 2.751197  | 18.255905 | -0.840908 |
| Cl                | 5.552948  | 19.013487 | 0.530937  |
| <b>1 (part b)</b> |           |           |           |
| Au                | 5.075128  | 12.261851 | -0.351958 |
| O                 | 10.404439 | 15.121007 | 6.450959  |
| O                 | -0.476323 | 10.446798 | -7.356686 |
| O                 | 12.309407 | 11.055907 | -5.704087 |
| O                 | -2.062256 | 10.561412 | 5.009458  |
| N                 | 7.054233  | 12.587376 | -0.104485 |
| N                 | 4.790884  | 12.523320 | 1.634991  |
| N                 | 3.096069  | 11.946129 | -0.601754 |
| N                 | 5.359270  | 11.991049 | -2.343165 |
| C                 | 7.089492  | 13.151817 | 2.300597  |
| C                 | 7.683703  | 12.991850 | 1.058391  |
| C                 | 8.030266  | 12.468784 | -1.071935 |
| C                 | 10.950893 | 14.288349 | 7.451302  |
| H                 | 10.235944 | 13.976007 | 8.061860  |
| H                 | 11.380386 | 13.497460 | 7.041142  |
| C                 | 11.980121 | 15.102746 | 8.225263  |
| H                 | 11.546628 | 15.926798 | 8.560484  |
| H                 | 12.701722 | 15.373531 | 7.604256  |
| C                 | 12.580550 | 14.381954 | 9.366854  |
| H                 | 11.864702 | 14.099403 | 9.990821  |
| H                 | 13.038354 | 13.567702 | 9.038463  |
| C                 | 13.583787 | 15.266971 | 10.107921 |
| H                 | 14.263063 | 15.588587 | 9.479775  |
| H                 | 13.114660 | 16.033543 | 10.501654 |
| H                 | 14.014598 | 14.748920 | 10.819287 |
| C                 | 9.068149  | 13.144418 | 0.789439  |
| H                 | 9.727129  | 13.424695 | 1.414277  |
| C                 | 9.288850  | 12.825796 | -0.506944 |
| H                 | 10.126941 | 12.837931 | -0.954835 |
| C                 | 2.382411  | 12.019592 | 1.760760  |
| C                 | 5.765606  | 12.885883 | 2.565678  |
| C                 | 3.624891  | 12.319447 | 2.312206  |
| C                 | 5.148404  | 12.927190 | 3.848517  |
| H                 | 5.570627  | 13.166578 | 4.665607  |
| C                 | 3.862992  | 12.566770 | 3.701465  |
| H                 | 3.221410  | 12.491007 | 4.398532  |
| C                 | 3.005338  | 11.679688 | -3.064883 |
| C                 | 2.141136  | 11.918645 | 0.396655  |
| C                 | 2.423709  | 11.816709 | -1.799458 |
| C                 | -0.368288 | 11.137284 | -8.614178 |
| H                 | -0.564016 | 12.101103 | -8.496671 |
| H                 | 0.544460  | 11.042570 | -8.983821 |

|   |           |           |            |
|---|-----------|-----------|------------|
| C | -1.390814 | 10.497881 | -9.546800  |
| H | -2.302422 | 10.636653 | -9.188553  |
| H | -1.225615 | 9.523053  | -9.603260  |
| C | -1.285259 | 11.113868 | -10.928319 |
| H | -1.436937 | 12.089840 | -10.862861 |
| H | -0.370829 | 10.971102 | -11.280664 |
| C | -2.297751 | 10.512548 | -11.903509 |
| H | -2.140349 | 9.548642  | -11.985046 |
| H | -3.205800 | 10.667569 | -11.568055 |
| H | -2.197548 | 10.935466 | -12.781606 |
| C | 0.857571  | 11.828154 | -0.203165  |
| H | 0.024791  | 11.805276 | 0.254672   |
| C | 1.033060  | 11.785061 | -1.522767  |
| H | 0.341592  | 11.738147 | -2.172700  |
| C | 7.829813  | 12.076808 | -2.395407  |
| C | 4.372257  | 11.706517 | -3.285461  |
| C | 6.582350  | 11.872303 | -2.966203  |
| C | 13.150748 | 9.920183  | -5.535751  |
| H | 13.960654 | 10.066459 | -6.087217  |
| H | 13.443826 | 9.903606  | -4.590939  |
| C | 5.019672  | 11.398294 | -4.508319  |
| H | 4.588261  | 11.168167 | -5.321809  |
| C | 6.342448  | 11.486458 | -4.320633  |
| H | 7.008687  | 11.320114 | -4.977280  |
| C | 7.959062  | 13.641291 | 3.434449   |
| C | 8.396590  | 14.942594 | 3.447993   |
| H | 8.131994  | 15.538923 | 2.758491   |
| C | 9.230599  | 15.391960 | 4.477360   |
| H | 9.544623  | 16.288734 | 4.466176   |
| C | 9.598925  | 14.559524 | 5.497053   |
| C | 9.154617  | 13.253939 | 5.497053   |
| H | 9.401509  | 12.665418 | 6.200776   |
| C | 8.331567  | 12.800937 | 4.448337   |
| H | 8.029371  | 11.900638 | 4.446382   |
| C | 1.223518  | 11.725743 | 2.658554   |
| C | 0.631237  | 12.693849 | 3.442188   |
| H | 0.959368  | 13.584527 | 3.436442   |
| C | -0.476535 | 12.338291 | 4.256781   |
| H | -0.878763 | 12.997182 | 4.809544   |
| C | -0.979392 | 11.046359 | 4.256781   |
| C | -0.372287 | 10.099208 | 3.484756   |
| H | -0.690653 | 9.204260  | 3.489303   |
| C | 0.703899  | 10.447907 | 2.697252   |
| H | 1.107439  | 9.778561  | 2.158150   |
| C | 2.102878  | 11.400020 | -4.208409  |
| C | 2.054624  | 12.219766 | -5.322912  |
| H | 2.608831  | 12.990454 | -5.352438  |
| C | 1.212985  | 11.947337 | -6.400651  |
| H | 1.202215  | 12.519440 | -7.159249  |
| C | 0.387114  | 10.824553 | -6.354214  |
| C | 0.409068  | 9.996527  | -5.247451  |
| H | -0.160407 | 9.236715  | -5.218446  |

|    |           |           |           |
|----|-----------|-----------|-----------|
| C  | 1.250737  | 10.260928 | -4.185190 |
| H  | 1.260320  | 9.680209  | -3.433578 |
| C  | 9.033923  | 11.816660 | -3.235154 |
| C  | 9.402290  | 12.660094 | -4.278065 |
| H  | 8.895980  | 13.447135 | -4.441487 |
| C  | 10.495535 | 12.376133 | -5.081049 |
| H  | 10.725370 | 12.960232 | -5.794137 |
| C  | 11.245263 | 11.250333 | -4.850796 |
| C  | 10.905292 | 10.404576 | -3.802080 |
| H  | 11.424205 | 9.627385  | -3.627745 |
| C  | 9.809649  | 10.696233 | -3.012640 |
| H  | 9.585536  | 10.112278 | -2.297965 |
| C  | -2.485295 | 9.174825  | 5.059765  |
| H  | -2.750578 | 8.859953  | 4.160191  |
| H  | -1.749589 | 8.600806  | 5.392433  |
| C  | -3.676205 | 9.124349  | 6.017541  |
| H  | -4.143516 | 8.258090  | 5.918706  |
| H  | -4.314852 | 9.845837  | 5.787346  |
| C  | -3.231594 | 9.289611  | 7.424214  |
| H  | -3.918586 | 8.913998  | 8.030476  |
| H  | -2.391809 | 8.785595  | 7.563353  |
| C  | -3.009405 | 10.729756 | 7.758952  |
| H  | -2.717247 | 10.806051 | 8.690568  |
| H  | -3.844328 | 11.226379 | 7.635060  |
| H  | -2.318934 | 11.098087 | 7.168343  |
| C  | 12.615991 | 8.543183  | -5.870489 |
| H  | 13.271688 | 7.850360  | -5.603530 |
| H  | 11.771488 | 8.378759  | -5.382197 |
| C  | 12.370871 | 8.476779  | -7.377776 |
| H  | 13.209200 | 8.680698  | -7.864230 |
| H  | 11.690753 | 9.147842  | -7.637285 |
| C  | 11.886441 | 7.076897  | -7.743472 |
| H  | 11.726766 | 7.028903  | -8.708678 |
| H  | 11.052873 | 6.885565  | -7.264236 |
| H  | 12.567073 | 6.419715  | -7.490562 |
| Au | 8.622024  | 17.655005 | 7.545532  |
| O  | 1.156108  | 17.803981 | 2.436040  |
| O  | 13.225343 | 21.945365 | 1.097089  |
| O  | 13.752959 | 20.654956 | 14.351158 |
| O  | 5.902513  | 10.304112 | 12.052496 |
| N  | 7.058136  | 16.426114 | 7.393255  |
| N  | 8.203275  | 18.407006 | 5.736980  |
| N  | 10.226383 | 18.858612 | 7.677686  |
| N  | 9.035453  | 16.916689 | 9.368789  |
| C  | 5.951235  | 17.392431 | 5.396438  |
| C  | 6.005646  | 16.527001 | 6.485787  |
| C  | 6.772922  | 15.355330 | 8.225263  |
| C  | 0.720040  | 16.759059 | 1.561465  |
| H  | 1.472180  | 16.454961 | 0.993881  |
| H  | 0.392072  | 15.988270 | 2.087584  |
| C  | -0.397697 | 17.314720 | 0.694629  |
| H  | -1.191755 | 17.492602 | 1.258072  |

|   |           |           |           |
|---|-----------|-----------|-----------|
| H | -0.107373 | 18.174295 | 0.296640  |
| C | -0.775946 | 16.344193 | -0.419873 |
| H | 0.022852  | 16.279875 | -1.002104 |
| H | -1.468649 | 16.807635 | -0.955338 |
| C | 5.035924  | 15.506556 | 6.795371  |
| H | 4.205330  | 15.367511 | 6.356903  |
| C | 5.524745  | 14.792605 | 7.818934  |
| H | 5.108368  | 14.034785 | 8.210403  |
| C | 10.305679 | 19.630161 | 5.334521  |
| C | 7.054458  | 18.176836 | 5.011393  |
| C | 9.081847  | 19.101933 | 4.930127  |
| C | 12.876452 | 23.257866 | 0.597884  |
| H | 11.923128 | 23.279429 | 0.333190  |
| H | 13.020272 | 23.939801 | 1.302846  |
| C | 13.763802 | 23.555724 | -0.605624 |
| H | 14.703926 | 23.369509 | -0.360433 |
| H | 13.694858 | 24.519876 | -0.819585 |
| C | 13.430036 | 22.777920 | -1.820742 |
| H | 13.557532 | 21.814080 | -1.633830 |
| H | 12.474788 | 22.918634 | -2.043410 |
| C | 14.285183 | 23.170987 | -3.026185 |
| H | 14.084793 | 22.574602 | -3.778048 |
| H | 14.086885 | 24.095701 | -3.280740 |
| H | 15.234143 | 23.092565 | -2.792255 |
| C | 7.229056  | 18.753588 | 3.720814  |
| H | 6.582747  | 18.766215 | 3.025159  |
| C | 8.448213  | 19.269311 | 3.658897  |
| H | 8.837179  | 19.681037 | 2.896740  |
| C | 10.743190 | 18.568274 | 10.075028 |
| C | 10.761252 | 19.602555 | 6.650254  |
| C | 10.895195 | 19.196163 | 8.838626  |
| C | 11.793498 | 20.446720 | 7.192026  |
| H | 12.342476 | 21.051021 | 6.705127  |
| C | 11.836923 | 20.221617 | 8.519368  |
| H | 12.399240 | 20.668924 | 9.140935  |
| C | 7.501509  | 14.998560 | 9.351375  |
| C | 9.936129  | 17.447515 | 10.268518 |
| C | 8.534992  | 15.749949 | 9.898952  |
| C | 5.037395  | 10.304173 | 13.161194 |
| H | 5.171894  | 9.463441  | 13.666939 |
| H | 5.285225  | 11.054472 | 13.756292 |
| C | 3.579595  | 10.426842 | 12.814847 |
| H | 3.449453  | 11.259313 | 12.294107 |
| H | 3.063407  | 10.518034 | 13.654517 |
| C | 3.013169  | 9.292212  | 12.035082 |
| H | 3.324153  | 9.301514  | 11.095514 |
| H | 3.233067  | 8.419180  | 12.447197 |
| C | 9.966200  | 16.588264 | 11.390760 |
| H | 10.480572 | 16.726689 | 12.178884 |
| C | 9.156440  | 15.550761 | 11.164377 |
| H | 9.018793  | 14.810122 | 11.743609 |
| C | 4.714622  | 17.452264 | 4.570235  |



|   |           |           |           |
|---|-----------|-----------|-----------|
| C | 4.251466  | 16.387544 | 3.844648  |
| H | 4.754839  | 15.582711 | 3.840313  |
| C | 3.072484  | 16.445435 | 3.117125  |
| H | 2.771445  | 15.683944 | 2.632974  |
| C | 2.339147  | 17.614630 | 3.099711  |
| C | 2.820705  | 18.725461 | 3.798210  |
| H | 2.342429  | 19.546466 | 3.764717  |
| C | 3.970668  | 18.640264 | 4.525733  |
| H | 4.272729  | 19.399717 | 5.010483  |
| C | 11.118143 | 20.328894 | 4.293545  |
| C | 10.756542 | 21.561182 | 3.794340  |
| H | 10.010608 | 22.016970 | 4.168337  |
| C | 11.466120 | 22.150326 | 2.751429  |
| H | 11.214442 | 23.008732 | 2.433525  |
| C | 12.528876 | 21.496610 | 2.178698  |
| C | 12.940393 | 20.294504 | 2.720470  |
| H | 13.697645 | 19.850308 | 2.357212  |
| C | 12.265709 | 19.731798 | 3.776926  |
| H | 12.587763 | 18.924754 | 4.161197  |
| C | 11.529174 | 19.075511 | 11.239838 |
| C | 10.883146 | 19.568177 | 12.354341 |
| H | 9.934877  | 19.528330 | 12.399056 |
| C | 11.601009 | 20.126848 | 13.420471 |
| H | 11.140943 | 20.482825 | 14.171735 |
| C | 12.976073 | 20.158721 | 13.372098 |
| C | 13.637559 | 19.590204 | 12.280815 |
| H | 14.586977 | 19.573901 | 12.261349 |
| C | 12.934459 | 19.068542 | 11.257252 |
| H | 13.403063 | 18.683026 | 10.525898 |
| C | 7.078612  | 13.769403 | 10.094377 |
| C | 7.451985  | 12.523324 | 9.657089  |
| H | 7.987932  | 12.434748 | 8.877769  |
| C | 7.042919  | 11.386137 | 10.353653 |
| H | 7.319572  | 10.527997 | 10.055737 |
| C | 6.240473  | 11.493827 | 11.472026 |
| C | 5.845596  | 12.714449 | 11.891899 |
| H | 5.282883  | 12.802192 | 12.652064 |
| C | 6.276944  | 13.853343 | 11.195335 |
| H | 6.001852  | 14.710386 | 11.500314 |
| C | -1.255558 | 14.976001 | -0.253472 |
| H | -0.530149 | 14.416220 | 0.094752  |
| H | -2.006424 | 14.966988 | 0.374655  |
| H | -1.549973 | 14.625381 | -1.120675 |
| C | 13.220887 | 21.383217 | 15.293455 |
| H | 12.775152 | 22.176347 | 14.904888 |
| H | 12.547950 | 20.857238 | 15.794730 |
| C | 14.361330 | 21.818550 | 16.229947 |
| H | 14.717577 | 21.017307 | 16.690705 |
| H | 13.990637 | 22.421267 | 16.923028 |
| C | 15.484353 | 22.512483 | 15.544992 |
| H | 16.164788 | 22.752160 | 16.222072 |
| H | 15.904262 | 21.878507 | 14.911544 |

|                    |           |           |           |
|--------------------|-----------|-----------|-----------|
| C                  | 15.095549 | 23.794829 | 14.767162 |
| H                  | 15.896007 | 24.179536 | 14.351584 |
| H                  | 14.704007 | 24.446133 | 15.385556 |
| H                  | 14.442836 | 23.570345 | 14.071836 |
| C                  | 1.335568  | 9.647180  | 12.153111 |
| H                  | 0.822481  | 8.963527  | 11.673217 |
| H                  | 1.158589  | 10.525837 | 11.758585 |
| H                  | 1.068432  | 9.652467  | 13.096569 |
| Au                 | 5.729344  | 18.883857 | 9.674503  |
| Cl                 | 6.316029  | 17.802105 | 11.591022 |
| Cl                 | 7.588889  | 20.195814 | 9.846516  |
| Cl                 | 5.142659  | 19.965609 | 7.757984  |
| Cl                 | 3.869799  | 17.571900 | 9.502491  |
| <b>1a (part a)</b> |           |           |           |
| Au                 | 3.311404  | 8.264257  | 9.299897  |
| N                  | 4.329607  | 7.284385  | 10.743442 |
| N                  | 2.292596  | 9.284373  | 10.726465 |
| N                  | 4.339035  | 7.254787  | 7.893137  |
| N                  | 2.273167  | 9.225379  | 7.854393  |
| C                  | 3.239436  | 8.239897  | 12.761620 |
| C                  | 4.027789  | 7.301791  | 12.110805 |
| C                  | 5.245438  | 6.267914  | 10.543627 |
| C                  | 5.524903  | 5.642505  | 11.793017 |
| H                  | 6.132770  | 4.926360  | 11.938677 |
| C                  | 4.771000  | 6.247434  | 12.724617 |
| H                  | 4.736897  | 6.011915  | 13.643593 |
| C                  | 0.814977  | 10.648402 | 9.268118  |
| C                  | 2.495767  | 9.218454  | 12.097746 |
| C                  | 1.395894  | 10.319526 | 10.497918 |
| C                  | 1.755202  | 10.252858 | 12.709381 |
| H                  | 1.726959  | 10.441804 | 13.639588 |
| C                  | 1.093889  | 10.929248 | 11.742954 |
| H                  | 0.527135  | 11.680816 | 11.875729 |
| C                  | 3.317789  | 8.218925  | 5.855152  |
| C                  | 1.195502  | 10.072210 | 8.068792  |
| C                  | 2.367033  | 8.999279  | 6.492907  |
| C                  | 0.600774  | 10.346700 | 6.784576  |
| H                  | -0.170062 | 10.881262 | 6.631384  |
| C                  | 1.318317  | 9.722524  | 5.842092  |
| H                  | 1.158225  | 9.753597  | 4.905703  |
| C                  | 5.817779  | 5.889855  | 9.342124  |
| C                  | 4.238776  | 7.418485  | 6.516850  |
| C                  | 5.380013  | 6.387539  | 8.107971  |
| C                  | 5.264237  | 6.659409  | 5.892155  |
| H                  | 5.429336  | 6.610583  | 4.958813  |
| C                  | 5.966710  | 6.024241  | 6.852052  |
| H                  | 6.709021  | 5.446135  | 6.720539  |
| C                  | 3.183404  | 8.159853  | 14.250439 |
| C                  | 1.974629  | 7.997628  | 14.944786 |
| H                  | 1.151793  | 8.045980  | 14.473936 |
| C                  | 1.970457  | 7.771506  | 16.296477 |
| H                  | 1.142853  | 7.666732  | 16.750611 |

|   |           |           |           |
|---|-----------|-----------|-----------|
| C | 3.168753  | 7.691659  | 17.014768 |
| C | 4.364601  | 7.900078  | 16.346540 |
| H | 5.184911  | 7.885421  | 16.827141 |
| C | 4.365875  | 8.127809  | 14.992672 |
| H | 5.193143  | 8.268419  | 14.547267 |
| C | -0.250616 | 11.695615 | 9.239822  |
| C | -1.428916 | 11.566846 | 9.960289  |
| H | -1.575730 | 10.784055 | 10.478938 |
| C | -2.400934 | 12.565138 | 9.934169  |
| H | -3.201266 | 12.463171 | 10.436972 |
| C | -2.197051 | 13.710953 | 9.174523  |
| C | -1.029584 | 13.854489 | 8.456233  |
| H | -0.883703 | 14.637388 | 7.937562  |
| C | -0.069728 | 12.855008 | 8.488882  |
| H | 0.731359  | 12.964626 | 7.989366  |
| C | 3.301243  | 8.183838  | 4.342390  |
| C | 3.510095  | 9.350168  | 3.663279  |
| H | 3.571830  | 10.160251 | 4.155896  |
| C | 3.634141  | 9.400690  | 2.283292  |
| H | 3.738995  | 10.232068 | 1.834186  |
| C | 3.604280  | 8.244080  | 1.593298  |
| C | 3.376406  | 7.058779  | 2.226699  |
| H | 3.307300  | 6.259162  | 1.718476  |
| C | 3.246175  | 7.008047  | 3.604510  |
| H | 3.121602  | 6.173742  | 4.043472  |
| C | 6.921980  | 4.895340  | 9.350830  |
| C | 8.129374  | 5.188025  | 9.988585  |
| H | 8.242336  | 6.032692  | 10.407827 |
| C | 9.159571  | 4.272249  | 10.021234 |
| H | 9.973833  | 4.486720  | 10.461089 |
| C | 9.001776  | 3.033833  | 9.407423  |
| C | 7.809371  | 2.722321  | 8.763139  |
| H | 7.699947  | 1.877096  | 8.343592  |
| C | 6.782810  | 3.648036  | 8.739196  |
| H | 5.970072  | 3.433166  | 8.297839  |
| O | 3.068026  | 7.436960  | 18.353181 |
| C | 4.301075  | 7.261952  | 19.084749 |
| H | 4.877949  | 8.058478  | 18.977963 |
| H | 4.789843  | 6.471475  | 18.744279 |
| C | 3.948077  | 7.067335  | 20.536565 |
| H | 3.441869  | 6.223816  | 20.644570 |
| H | 3.372544  | 7.813023  | 20.840402 |
| C | 5.213737  | 7.017317  | 21.394160 |
| H | 5.704325  | 7.872341  | 21.307682 |
| H | 5.803442  | 6.291658  | 21.068405 |
| C | 4.877187  | 6.770843  | 22.874273 |
| H | 4.350366  | 7.523364  | 23.218726 |
| H | 5.706527  | 6.691153  | 23.389940 |
| H | 4.358372  | 5.944270  | 22.958966 |
| O | -3.197235 | 14.646761 | 9.217403  |
| C | -3.015778 | 15.831410 | 8.445350  |
| H | -2.836402 | 15.590634 | 7.501517  |

|                    |           |           |           |
|--------------------|-----------|-----------|-----------|
| H                  | -2.237860 | 16.338392 | 8.787974  |
| C                  | -4.273160 | 16.698068 | 8.525885  |
| H                  | -4.176885 | 17.452599 | 7.890960  |
| H                  | -5.048221 | 16.158009 | 8.231169  |
| C                  | -4.559006 | 17.236270 | 9.840574  |
| H                  | -3.785483 | 17.761375 | 10.167744 |
| H                  | -4.727976 | 16.499308 | 10.479177 |
| C                  | -5.828039 | 18.157847 | 9.736095  |
| H                  | -5.691274 | 18.822253 | 9.027709  |
| H                  | -5.970371 | 18.616490 | 10.590033 |
| H                  | -6.612213 | 17.610923 | 9.523285  |
| O                  | 3.764686  | 8.200400  | 0.217664  |
| C                  | 3.983466  | 9.449941  | -0.485390 |
| H                  | 4.676547  | 9.986989  | -0.025314 |
| H                  | 3.146183  | 9.977785  | -0.517082 |
| C                  | 4.447092  | 9.091033  | -1.921970 |
| H                  | 3.918175  | 8.325178  | -2.261286 |
| H                  | 4.295536  | 9.861235  | -2.524637 |
| C                  | 5.925801  | 8.727521  | -1.917617 |
| H                  | 6.455485  | 9.450970  | -1.496786 |
| H                  | 6.073193  | 7.892330  | -1.407000 |
| C                  | 6.345110  | 8.536790  | -3.365080 |
| H                  | 7.297030  | 8.306108  | -3.400537 |
| H                  | 5.816366  | 7.822925  | -3.768258 |
| H                  | 6.196985  | 9.374761  | -3.857653 |
| O                  | 10.074333 | 2.176111  | 9.513643  |
| C                  | 9.917289  | 0.839974  | 8.980802  |
| H                  | 9.712408  | 0.876983  | 8.013178  |
| H                  | 9.178528  | 0.369951  | 9.442597  |
| C                  | 11.209267 | 0.130751  | 9.211526  |
| H                  | 11.120449 | -0.807199 | 8.907537  |
| H                  | 11.399464 | 0.116033  | 10.183481 |
| C                  | 12.385055 | 0.777702  | 8.486706  |
| H                  | 12.493292 | 1.705734  | 8.813484  |
| H                  | 12.182282 | 0.819708  | 7.518821  |
| C                  | 13.714329 | 0.018225  | 8.686956  |
| H                  | 13.936933 | -0.003480 | 9.641020  |
| H                  | 14.428148 | 0.474967  | 8.195036  |
| H                  | 13.620419 | -0.897616 | 8.352059  |
| O                  | -1.229895 | 7.178548  | 9.553258  |
| C                  | -0.151919 | 6.834135  | 10.132243 |
| C                  | -0.111396 | 6.891406  | 11.629769 |
| H                  | -0.889179 | 6.421460  | 11.996271 |
| H                  | -0.127444 | 7.826929  | 11.922200 |
| H                  | 0.709972  | 6.463509  | 11.951389 |
| O                  | 0.830687  | 6.440738  | 9.487959  |
| <b>1a (part b)</b> |           |           |           |
| Au                 | -2.642132 | 19.871009 | 1.625512  |
| N                  | -1.767472 | 18.874013 | 3.151770  |
| N                  | -3.529163 | 20.893652 | 0.134951  |
| N                  | -1.030646 | 21.075554 | 1.490996  |
| N                  | -4.228811 | 18.620465 | 1.732167  |

|   |           |           |           |
|---|-----------|-----------|-----------|
| C | 0.267700  | 20.256914 | 3.415143  |
| C | -0.620760 | 19.284699 | 3.824350  |
| C | -2.309816 | 17.819385 | 3.857000  |
| C | -0.468194 | 18.446798 | 4.964908  |
| H | 0.233199  | 18.508177 | 5.602575  |
| C | -1.472365 | 17.558107 | 4.995381  |
| H | -1.605401 | 16.882374 | 5.649221  |
| C | -1.762547 | 22.557122 | -0.333025 |
| C | 0.111213  | 21.009502 | 2.276762  |
| C | -0.790692 | 22.038262 | 0.531099  |
| C | 1.073771  | 21.897507 | 1.730426  |
| H | 1.949014  | 22.043450 | 2.070221  |
| C | 0.540529  | 22.497039 | 0.646461  |
| H | 0.977032  | 23.114303 | 0.070784  |
| C | -5.684629 | 19.678736 | 0.028296  |
| C | -3.047129 | 22.065801 | -0.446210 |
| C | -4.852261 | 20.756504 | -0.267726 |
| C | -4.110449 | 22.675308 | -1.181914 |
| H | -4.057111 | 23.488542 | -1.669676 |
| C | -5.200420 | 21.895106 | -1.064375 |
| H | -6.053645 | 22.069252 | -1.444960 |
| C | -3.447308 | 17.109890 | 3.519621  |
| C | -5.341629 | 18.649391 | 0.901128  |
| C | -4.313146 | 17.468182 | 2.481366  |
| C | -6.109390 | 17.483223 | 1.129674  |
| H | -6.920379 | 17.255886 | 0.692257  |
| C | -5.485369 | 16.745523 | 2.083041  |
| H | -5.771698 | 15.907119 | 2.423968  |
| C | 1.426450  | 20.556626 | 4.314094  |
| C | 2.740713  | 20.251450 | 4.018071  |
| H | 2.930969  | 19.793539 | 3.207883  |
| C | 3.785195  | 20.585099 | 4.853899  |
| H | 4.682372  | 20.376986 | 4.621587  |
| C | 3.480633  | 21.237717 | 6.053226  |
| C | 2.178302  | 21.574109 | 6.371015  |
| H | 1.986537  | 22.040127 | 7.176392  |
| C | 1.159300  | 21.226810 | 5.506890  |
| H | 0.262941  | 21.448826 | 5.729038  |
| C | -1.354704 | 23.738063 | -1.162324 |
| C | -0.896447 | 24.896762 | -0.563749 |
| H | -0.916892 | 24.973274 | 0.381934  |
| C | -0.400344 | 25.961461 | -1.334278 |
| H | -0.074252 | 26.747654 | -0.911358 |
| C | -0.389828 | 25.854861 | -2.720796 |
| C | -0.898018 | 24.726748 | -3.304134 |
| H | -0.933368 | 24.667257 | -4.252190 |
| C | -1.358359 | 23.680384 | -2.551018 |
| H | -1.684741 | 22.901615 | -2.984299 |
| C | -7.013783 | 19.627502 | -0.652991 |
| C | -7.095430 | 19.688101 | -2.041685 |
| H | -6.293436 | 19.752886 | -2.546621 |
| C | -8.304489 | 19.656114 | -2.712089 |

|   |            |           |           |
|---|------------|-----------|-----------|
| H | -8.330194  | 19.705254 | -3.660928 |
| C | -9.471238  | 19.555271 | -1.985092 |
| C | -9.427413  | 19.504822 | -0.585515 |
| H | -10.233802 | 19.454082 | -0.085498 |
| C | -8.207984  | 19.529878 | 0.069652  |
| H | -8.181156  | 19.479674 | 1.018405  |
| C | -3.763340  | 15.896754 | 4.335860  |
| C | -4.972342  | 15.766442 | 5.021500  |
| H | -5.620169  | 16.459363 | 4.963014  |
| C | -5.244642  | 14.641064 | 5.785500  |
| H | -6.075168  | 14.568665 | 6.239677  |
| C | -4.305478  | 13.617586 | 5.889978  |
| C | -3.096114  | 13.724734 | 5.228281  |
| H | -2.447776  | 13.033516 | 5.298739  |
| C | -2.837117  | 14.865228 | 4.451222  |
| H | -2.006901  | 14.935604 | 3.994563  |
| O | 4.414785   | 21.620647 | 6.984827  |
| C | 5.793782   | 21.317573 | 6.710570  |
| H | 6.090465   | 21.770056 | 5.880401  |
| H | 5.922178   | 20.341971 | 6.603262  |
| C | 6.575662   | 21.833927 | 7.912074  |
| H | 7.536360   | 21.632457 | 7.780387  |
| H | 6.479765   | 22.818947 | 7.957870  |
| C | 6.128906   | 21.237501 | 9.235469  |
| H | 6.292553   | 20.261761 | 9.222648  |
| H | 5.154538   | 21.380888 | 9.342102  |
| C | 6.855840   | 21.852255 | 10.419559 |
| H | 7.811238   | 21.641331 | 10.360137 |
| H | 6.491607   | 21.484697 | 11.251818 |
| H | 6.733910   | 22.823715 | 10.409546 |
| O | 0.142806   | 26.778947 | -3.571860 |
| C | 0.669956   | 28.028480 | -3.069057 |
| H | 1.064819   | 27.898305 | -2.171521 |
| H | 1.373208   | 28.372233 | -3.676165 |
| C | -0.406424  | 28.935518 | -3.003758 |
| H | -0.103834  | 29.747352 | -2.524659 |
| H | -1.130914  | 28.525847 | -2.469481 |
| C | -0.979907  | 29.356554 | -4.353273 |
| H | -0.277913  | 29.810161 | -4.885569 |
| H | -1.274673  | 28.555234 | -4.853703 |
| C | -2.145212  | 30.288521 | -4.161729 |
| H | -2.845682  | 29.832931 | -3.649588 |
| H | -2.499771  | 30.552067 | -5.036759 |
| H | -1.849825  | 31.085400 | -3.675077 |
| O | -10.727663 | 19.516901 | -2.533170 |
| C | -10.809983 | 19.576683 | -3.968008 |
| H | -10.274995 | 18.846079 | -4.368901 |
| H | -10.452032 | 20.439970 | -4.292458 |
| C | -12.250410 | 19.436106 | -4.368509 |
| H | -12.740686 | 20.257889 | -4.117652 |
| H | -12.653675 | 18.677675 | -3.875153 |
| C | -12.402639 | 19.197079 | -5.863859 |

|           |            |           |           |
|-----------|------------|-----------|-----------|
| H         | -11.875774 | 18.397399 | -6.115717 |
| H         | -13.352878 | 19.006895 | -6.062956 |
| C         | -11.950352 | 20.365210 | -6.712747 |
| H         | -12.434609 | 21.173225 | -6.440711 |
| H         | -12.135130 | 20.175600 | -7.655666 |
| H         | -10.987879 | 20.505548 | -6.589832 |
| O         | -4.691875  | 12.545074 | 6.636129  |
| C         | -3.810929  | 11.402722 | 6.677921  |
| H         | -2.985696  | 11.626947 | 7.177698  |
| H         | -3.557363  | 11.133019 | 5.760142  |
| C         | -4.538407  | 10.282515 | 7.363561  |
| H         | -5.380224  | 10.092770 | 6.876757  |
| H         | -4.772818  | 10.557255 | 8.284126  |
| C         | -3.690275  | 9.017225  | 7.413624  |
| H         | -2.882516  | 9.190377  | 7.959437  |
| H         | -3.393839  | 8.788118  | 6.497347  |
| C         | -4.448157  | 7.829750  | 8.005669  |
| H         | -4.703659  | 8.031892  | 8.930261  |
| H         | -3.874470  | 7.034966  | 7.992370  |
| H         | -5.254608  | 7.658309  | 7.474940  |
| Au        | -4.925927  | 21.128121 | 4.275785  |
| Cl        | -5.218382  | 19.521461 | 5.857764  |
| Cl        | -2.834959  | 21.508098 | 5.080705  |
| Cl        | -6.993051  | 20.761271 | 3.439086  |
| Cl        | -4.594912  | 22.772761 | 2.734726  |
| <b>1b</b> |            |           |           |
| Au        | 14.213292  | 1.264276  | 2.111820  |
| N         | 13.240106  | 2.215975  | 0.699938  |
| N         | 15.894451  | 1.371417  | 1.023456  |
| N         | 15.178106  | 0.241267  | 3.585149  |
| N         | 12.532858  | 1.112095  | 3.214833  |
| C         | 17.322879  | 1.749366  | -0.726389 |
| H         | 17.643120  | 2.070427  | -1.560618 |
| C         | 18.030616  | 1.004719  | 0.136325  |
| H         | 18.925165  | 0.700415  | 0.036319  |
| C         | 17.092877  | 0.752261  | 1.318488  |
| C         | 16.006507  | 1.987038  | -0.195332 |
| C         | 13.732187  | 2.830477  | -0.463913 |
| C         | 16.555860  | -0.010809 | 3.570906  |
| C         | 11.827948  | 2.591825  | 0.710112  |
| C         | 12.733423  | 3.657076  | -1.074324 |
| H         | 12.859072  | 4.251015  | -1.804437 |
| C         | 11.561716  | 3.424782  | -0.398802 |
| H         | 10.709325  | 3.769414  | -0.638470 |
| C         | 14.741114  | -0.065703 | 4.816145  |
| C         | 16.983665  | -0.504381 | 4.867013  |
| H         | 17.864565  | -0.736134 | 5.137038  |
| C         | 15.842735  | -0.565493 | 5.609680  |
| H         | 15.781317  | -0.882639 | 6.502589  |
| C         | 12.427128  | 0.576942  | 4.411239  |
| C         | 11.267611  | 1.508850  | 2.775337  |
| C         | 11.028861  | 0.590914  | 4.848700  |

|   |           |           |           |
|---|-----------|-----------|-----------|
| H | 10.696457 | 0.291606  | 5.685920  |
| C | 10.307335 | 1.109618  | 3.841522  |
| H | 9.362256  | 1.202080  | 3.812853  |
| O | 22.857964 | -1.458201 | 3.153792  |
| O | 11.546892 | -2.118373 | 10.110446 |
| O | 5.539667  | 3.669438  | 0.893235  |
| O | 16.290853 | 5.784560  | -5.434695 |
| C | 15.016512 | 2.725502  | -0.876958 |
| C | 15.421796 | 3.493677  | -2.089641 |
| C | 14.777441 | 3.281971  | -3.357262 |
| H | 14.144832 | 2.581075  | -3.459526 |
| C | 15.094952 | 4.132545  | -4.468211 |
| H | 14.659968 | 4.002048  | -5.303151 |
| C | 15.999465 | 5.108753  | -4.335955 |
| C | 16.667686 | 5.307167  | -3.088681 |
| H | 17.333540 | 5.977529  | -2.991361 |
| C | 16.334356 | 4.535065  | -2.085572 |
| H | 16.769372 | 4.709206  | -1.259584 |
| C | 17.058241 | 7.000312  | -5.371619 |
| H | 18.001112 | 6.806823  | -5.143407 |
| H | 16.684201 | 7.614120  | -4.690543 |
| C | 16.954008 | 7.626711  | -6.787773 |
| H | 17.560491 | 8.408619  | -6.823299 |
| H | 17.289004 | 6.964008  | -7.442440 |
| C | 15.596968 | 8.069596  | -7.225235 |
| H | 14.973490 | 7.300700  | -7.197014 |
| H | 15.258592 | 8.761749  | -6.603470 |
| C | 15.641835 | 8.614922  | -8.592556 |
| H | 14.742861 | 8.900025  | -8.859448 |
| H | 16.248339 | 9.385037  | -8.616016 |
| H | 15.963625 | 7.926008  | -9.208746 |
| C | 17.430683 | 0.206729  | 2.480305  |
| C | 18.935641 | -0.264447 | 2.677671  |
| C | 19.177860 | -1.580207 | 2.997119  |
| H | 18.456661 | -2.186721 | 3.111388  |
| C | 20.472039 | -2.007317 | 3.149722  |
| H | 20.621443 | -2.929128 | 3.325948  |
| C | 21.565433 | -1.177145 | 3.062230  |
| C | 21.261190 | 0.204044  | 2.740747  |
| H | 21.962990 | 0.840506  | 2.675595  |
| C | 19.954936 | 0.598360  | 2.527103  |
| H | 19.773503 | 1.495569  | 2.270404  |
| C | 23.117415 | -2.897764 | 3.115132  |
| H | 22.643907 | -3.309577 | 2.349799  |
| H | 22.796470 | -3.324378 | 3.949015  |
| C | 24.699835 | -3.104588 | 2.962529  |
| H | 24.863694 | -4.025889 | 2.637343  |
| H | 25.030247 | -2.482416 | 2.267129  |
| C | 25.466704 | -2.905681 | 4.140623  |
| H | 25.177365 | -2.076468 | 4.598167  |
| H | 26.425895 | -2.818145 | 3.911821  |
| C | 25.238236 | -4.189198 | 5.111177  |



|    |           |           |           |
|----|-----------|-----------|-----------|
| H  | 25.758044 | -4.074381 | 5.933869  |
| H  | 24.286326 | -4.264792 | 5.334913  |
| H  | 25.530243 | -5.003737 | 4.651110  |
| C  | 13.416755 | 0.019637  | 5.265815  |
| C  | 13.024674 | -0.500406 | 6.563956  |
| C  | 13.036606 | -1.854296 | 6.781669  |
| H  | 13.384292 | -2.428132 | 6.108752  |
| C  | 12.536675 | -2.424146 | 7.994353  |
| H  | 12.497011 | -3.363009 | 8.138858  |
| C  | 12.112191 | -1.498469 | 8.948629  |
| C  | 12.156086 | -0.216978 | 8.775680  |
| H  | 11.874092 | 0.360741  | 9.475211  |
| C  | 12.624448 | 0.336397  | 7.550788  |
| H  | 12.656521 | 1.278054  | 7.427891  |
| C  | 11.054356 | -1.264287 | 11.127798 |
| H  | 10.311045 | -0.708645 | 10.781817 |
| H  | 11.772166 | -0.664326 | 11.451784 |
| C  | 10.567413 | -2.160453 | 12.248920 |
| H  | 10.284796 | -1.589764 | 13.006684 |
| H  | 9.768524  | -2.652674 | 11.932727 |
| C  | 11.516657 | -3.102849 | 12.723006 |
| H  | 12.397454 | -2.657248 | 12.805900 |
| H  | 11.607086 | -3.830916 | 12.060181 |
| C  | 11.117087 | -3.749062 | 14.171715 |
| H  | 11.799818 | -4.388313 | 14.448354 |
| H  | 11.040427 | -3.035088 | 14.839790 |
| H  | 10.249617 | -4.209413 | 14.093644 |
| C  | 10.892167 | 2.170378  | 1.633868  |
| C  | 9.498131  | 2.571105  | 1.485334  |
| C  | 8.870164  | 3.466005  | 2.343979  |
| H  | 9.387065  | 3.848279  | 3.042168  |
| C  | 7.562583  | 3.828248  | 2.246314  |
| H  | 7.146630  | 4.377328  | 2.900329  |
| C  | 6.863689  | 3.352521  | 1.135365  |
| C  | 7.364007  | 2.408511  | 0.327587  |
| H  | 6.793621  | 1.985049  | -0.303924 |
| C  | 8.700979  | 2.037751  | 0.392698  |
| H  | 9.082054  | 1.455875  | -0.254114 |
| C  | 4.930462  | 4.817488  | 1.629798  |
| H  | 4.782003  | 4.575126  | 2.578662  |
| H  | 5.529101  | 5.604367  | 1.595778  |
| C  | 3.630424  | 5.126463  | 0.966485  |
| H  | 2.960412  | 4.428528  | 1.176812  |
| H  | 3.745768  | 5.167340  | -0.016278 |
| C  | 3.170493  | 6.503543  | 1.515855  |
| H  | 3.909646  | 7.156757  | 1.442300  |
| H  | 2.926077  | 6.417165  | 2.471087  |
| C  | 1.924667  | 7.012611  | 0.691799  |
| H  | 1.636850  | 7.881901  | 1.040975  |
| H  | 2.173776  | 7.105544  | -0.251306 |
| H  | 1.192463  | 6.367636  | 0.775121  |
| Au | 15.634901 | 5.476897  | 4.083651  |

|    |           |          |          |
|----|-----------|----------|----------|
| Cl | 14.829556 | 7.605986 | 3.949361 |
| Cl | 16.485139 | 3.356720 | 4.163005 |
| Cl | 17.084561 | 6.160177 | 5.697172 |
| Cl | 14.154189 | 4.761488 | 2.488443 |
